# Supplementary material for: Effect of the VAN Hiele Instructional Model on Students’ Achievement in Geometry
Source: Hindawi journal article supplement (doi:10.1155/2021/6993668), 2021-12-22
Supplement: f1 [file 6993668.f1.docx]

**Control Group**

PRETEST POST_TEST

0 60

20 20

13 47

20 67

13 7

7 40

7 27

13 33

20 47

13 73

13 20

7 33

33 13

7 53

13 27

20 87

13 13

0 60

7 13

13 27

13 47

27 53

13 27

7 67

13 27

13 40

7 27

7 13

13 33

20 60

33 33

40 20

27 33

7 33

13 33

**Experimental Group**

PRETEST POST_TEST

7 27

13 33

7 93

7 60

27 33

13 67

20 67

13 20

33 87

7 47

13 13

13 60

13 7

7 80

27 60

27 47

7 60

20 47

13 47

20 60

7 27

0 80

20 13

7 60

20 47

13 13

13 67

7 73

13 80

27 47

7 13

13 47

13 40

7 27

7 73

13 70

7 80

13 80

0 47

20
